# Supplementary material for: Characterizing ecomorphological patterns in hyenids: a multivariate approach using postcanine dentition
Source: PeerJ. 2019 Jan 11;6:e6238. doi: 10.7717/peerj.6238 (PMC6330948; doi:10.7717/peerj.6238)
Supplement: Supplemental Information 4 [file peerj-07-6238-s004.xls]

## Sheet: Species Means
Id	Species	LP2	WP2	LP3	WP3	LP4	WP4	Lp3	Wp3	Lp4	Wp4	Lm1	Wm1
1	Protictitherium aegaeum							10.7	4.7	11.6	5.9	14.5	6.7
2	Protictitherium cingulatum							7.61	3.28	8.97	3.72	10.6	4.54
3	Protictitherium crassum	9.82222	4.45556	11.8011	6.0125	18.4	9.38143	10.74	4.89556	11.61	5.55211	14.0158	6.415
4	Protictitherium gaillardi							9.3	3.75	9.6	4.375	11.72	5.26
5	Protictitherium intermedium							6.95	2.7	7.825	3.4825	9.88091	4.80545
6	Protictitherium thessalonikensis	7.2	3.35	8.16	4.14	12.3	7.425	8.2	3.6	9	4.2	11.4	5
7	Tungurictis spocki	7.66667		9.13333	4.3	14	7.3					10.6	4.8
8	Plioviverrops faventinus	6.83333	3.98667	9.26	5.96	11.2467	8.18	8.485	3.785	9.15	4.58333	10.7575	5.19
9	Plioviverrops guerini							7.82	3.35	8.95	3.93333	11.55	5.2
10	Plioviverrops orbignyi	5.91667	2.825	6.85	3.64545	9.43846	6.25833	6.83636	2.95455	7.59	3.59	8.94545	4.27273
11	Hyaenictitherium hyaenoides	14.9472	8.02727	18.7004	10.6072	28.4991	15.9214	16.6679	8.59087	18.7164	9.39571	21.8834	9.73813
12	Hyaenictitherium minimum	11	5.2	14.25	7.475	19	10	13.1429	6.34286	14	6.85556	15.6	6.775
13	Hyaenictitherium namaquensis	16.4	9.6	21.3	13.6	30.93	18.35	19.3	10.8	21.3	11.07	23.5	10.87
14	Hyaenictitherium parvum	14.6193	7.76182	19.1648	10.509	28.5671	15.5607	16.9367	8.80783	19.3412	9.5	22.2822	10.0611
15	Hyaenotherium wongii	13.2303	6.47537	16.6189	9.08953	25.5263	13.9582	15.1495	7.32939	16.9348	8.21274	20.0743	8.62051
16	Ictitherium ebu	12.8	6.3	16.1	9	23.6	13.1
17	Ictitherium ibericum	12.08	6.2	15.15	8.3	22	13.7	13.85	6.35	14.15	6.95	16.6	7.4
18	Ictitherium intuberculatum	12.61	6.15333	16.544	9.008	25.135	14.1325	15.4	7.1	16.8	8.35	19.5	9
19	Ictitherium kurteni	12.3	5.7	17.2	10.6	22.8	14
20	Ictitherium pannonicum	14.3	7	18.25	10.1	26.4367	15.8	15.9727	7.77143	17.0456	8.78571	20.1375	9.21429
21	Ictitherium viverrinum	11.8244	5.63931	14.5767	7.695	20.6011	12.339	13.2442	6.51379	14.479	7.39105	17.3723	7.83415
22	Miohyaenotherium bessarabicum	14.575	7.2	18.9	10.55	28.5167	15.04	15.9	8.6	17.7	9.16667	21.2333	9.6
23	Thalassictis chinjiensis							12.1	6.2	14	6.7	15.2	7.8
24	Thalassictis montadai	14.4	7.75	17.25	11.25	27	15.9	17.26	9.825	19.975	10.3	21.64	10.12
25	Thalassictis robusta	10.25	5.5	13.5	7.35	22.5	11.57	14.1275	6.85	15.542	7.638	17.98	8.14
26	Thalassictis spelaea	11.9122	5.74111	14.8417	8.1	21.9709	12.575	13.9462	6.73846	15.373	7.859	17.3538	8.50769
27	Chasmaporthetes australis	20.8667	12.7667	26.425	15.875	39.1	19.3	23.3167	12.55	24.8857	12.8857	28.67	12.7833
28	Chasmaporthetes bonisi	17.45	10.4	22.95	14	34.75	19.85	19.7	12.3667	22	12.4667	27.8	12.6
29	Chasmaporthetes borissiaki	18.25	10.25	22	13	33.75	17.3	19.3	10.2	22.8	11.6	24.8	9.8
30	Chasmaporthetes gansgriensis	17.8	9.2	20.6	12.4	32.1	17.2	20	10.5	22.15	10.45	23.3	11.2
31	Chasmaporthetes lunensis	18.284	11.0984	21.9272	13.7233	33.2985	17.7522	19.9741	10.7716	23.7422	11.6919	24.875	11.2374
32	Chasmaporthetes nitidula							20.7111	11.0909	24.4333	11.7	26.95	11.8
33	Chasmaporthetes ossifragus							22.04	11.54	25.0714	11.9	25.24	10.5
34	Chasmaporthetes sp. Florida	18.6	10.2	21.55	12.35	34.4	16.7	19.9	10.85	24.75	11.95	29.26	12.14
35	Hyaenictis aff. almerai	20	11.5	25.85	14.8	37.5	20.7	20.865	13.5	22.5	13.3	25.91	13.12
36	Hyaenictis almerai							20	11	23	11	24	11
37	Hyaenictis hendeyi							21.17	12	24.06	12.524	25.43	12.03
38	Hyaenictis wehaietu	14.8	7.8	18	10.7	28.2	16.3	17.3333	10.25	19.75	11.1	23.025	10.925
39	Lycyaena chaeretis	16.2	9.15	22.5	13.1	33.075	18.1333	18.75	10.4	21.8111	11.4111	23.1	10.44
40	Lycyaena dubia	16.53	8.72	20.78	11.516	32.03	17.14	18.75	9.48333	21.76	10.14	23.08	9.45
41	Lycyaena macrostoma							19.55	11.05	23.95	11.8	23.5	10.9
42	Werdelinus africanus							18.75	10.3333	22.3333	11.25	25	11
43	Belbus djurabensis							15.3333	9.2	17	9.5	19.3333	9.8
44	Ikelohyaena abronia	14.0275	8.015	18.7556	11.2889	27.2	15.7467	16.9244	9.49667	18.2867	9.57	20.6625	9.49286
45	Metahyaena confector							13.7	7.2	15.4	8.1	17.9	8.2
46	Palinhyaena reperta	13.74	7.89	18.01	11.39	26.83	15.06	15.55	9.48	17.14	9.55	20.86	9.18
47	Tongxinictis primordialis	14.15	8.55	17.65	11.25	26.5	15.7
48	Adcrocuta eximia	17.8249	12.2561	22.408	15.4551	37.9119	18.2902	19.6373	13.2989	22.1117	13.0142	27.6616	12.7696
49	Allohyaena kadici	18.37	11.24	25.34	16.47	39.8	22.73	21.71	14.108	24.0667	13.7491	26.472	13.6481
50	Crocuta crocuta (fossil)	17.3846	12.9262	24.4307	17.9483	39.7669	21.668	22.3385	16.1686	23.8318	14.7287	31.4771	13.5395
51	Crocuta crocuta (living)	14.7579	10.8947	21.4684	15.8632	36.0368	19.5789	20.3	14.2947	21.6158	12.1947	27.9947	11.3316
52	Crocuta dietrichi	15.1333	10.3667	20.2429	14.1667	33.7667	18.0667	17.6316	12.37	19.8267	12.25	24.6538	11.1583
53	Crocuta eturono	19	16	24.67	17.5	41	22	20.3	14.84	21.73	13.32	32.8	13.73
54	Hyaena hyaena (fossil)	14.6818	9.44762	19.6733	12.6437	28.8897	17.1778	18.0714	10.9318	19.375	11.0091	21.225	10.2636
55	Hyaena hyaena (living)	15.4706	9.54706	20.3353	12.9	29.4647	17.7412	18.9687	11.2062	19.825	11.1188	20.4125	10.2062
56	Pachycrocuta brevirostris	20.346	13.8639	26.3953	18.5235	41.1613	23.6318	23.7834	17.339	26.2343	16.9635	29.1967	14.9043
57	Parahyaena brunnea (fossil)	16.512	11.53	21.906	15.7275	32.415	19.39	20.2627	13.8382	23.1513	13.1757	23.9333	12.09
58	Parahyaena brunnea (living)	16.58	11.3533	22.4733	15.9067	34.2067	20.9133	20.6267	13.9267	22.9333	13.3667	23.3467	11.8867
59	Parahyaena howelli	13.9	8.3	20.5	13.45	31.4	16.7333	19.2429	11.8429	20.82	11.4143	24.4	10.84
60	Pliocrocuta perrieri	17.7796	11.8616	23.2953	16.2202	35.1789	20.12	20.7951	14.1271	22.9214	13.9232	24.846	12.4142
